# Supplementary material
Source: PubMed Central journal article supplement (PMC10276576)
Supplement: NIHMS1896382-supplement-Supplemental_Figure_1.pdf [file NIHMS1896382-supplement-Supplemental_Figure_1.pdf]

### Supplemental Figure 1.

*Variable importance plot for moderation of ESTEEM versus CMHT/VCT 8-month comorbidity index outcomes*

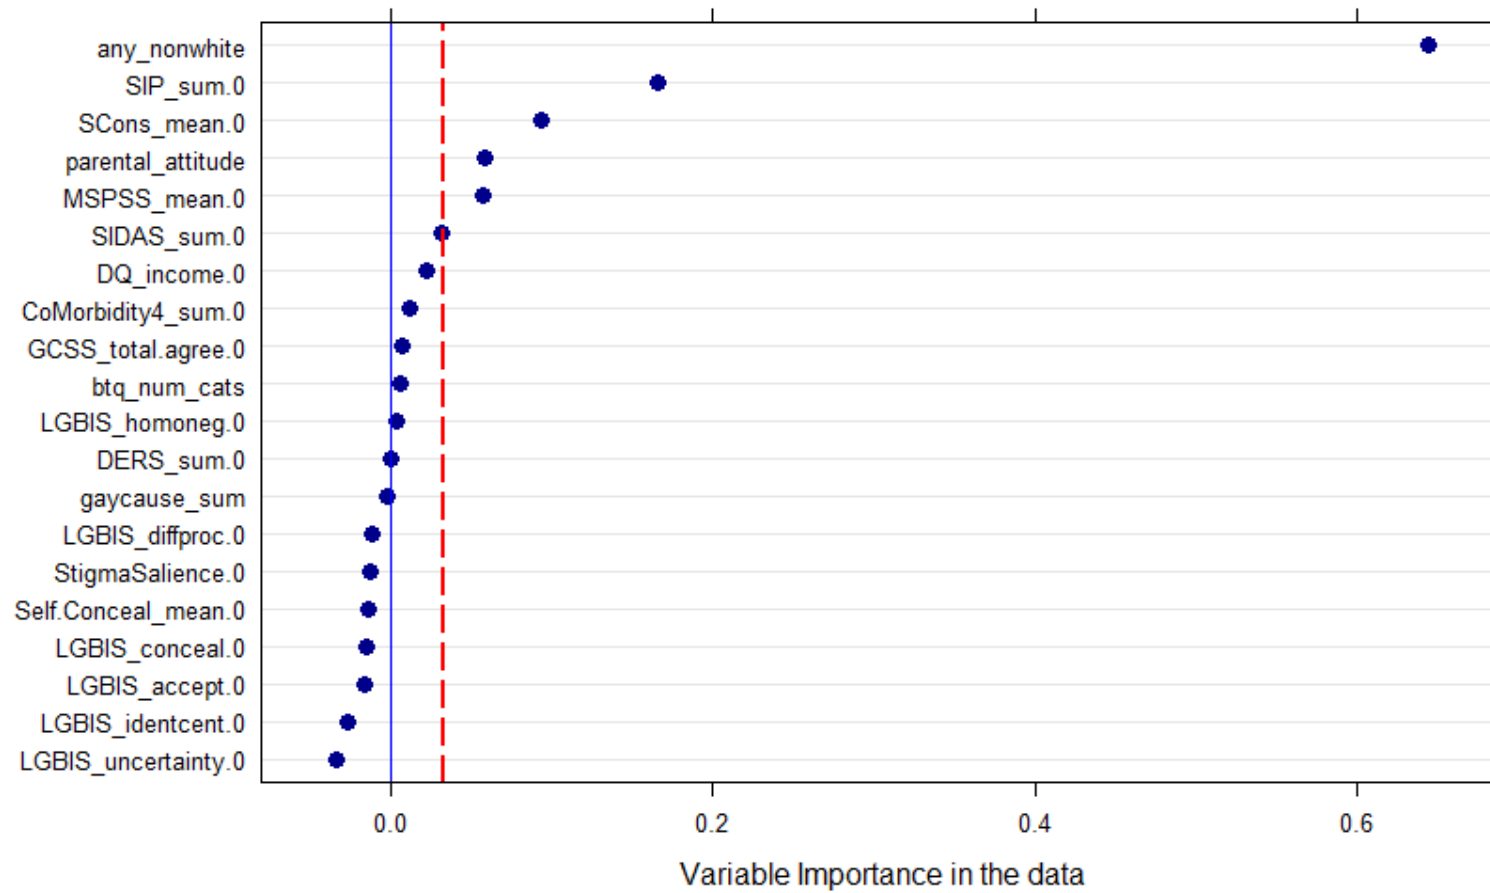

*Note.* Variables with a importance statistic higher than that of the absolute value of the moderator with the most negative predictive value (i.e., in which the permuted data is superior to the real data) are retained. In the figure, this is reflected by a variable's point being to the right by the dashed red line.
